# Supplementary material for: Longevity-promoting properties of ginger extract inCaenorhabditis elegans viathe insulin/IGF-1 signaling pathway
Source: Royal Society of Chemistry journal article supplement (doi:10.1039/d2fo01602h), 2022-01-01
Supplement: d2fo01602h1.pdf [file d2fo01602h1.pdf]

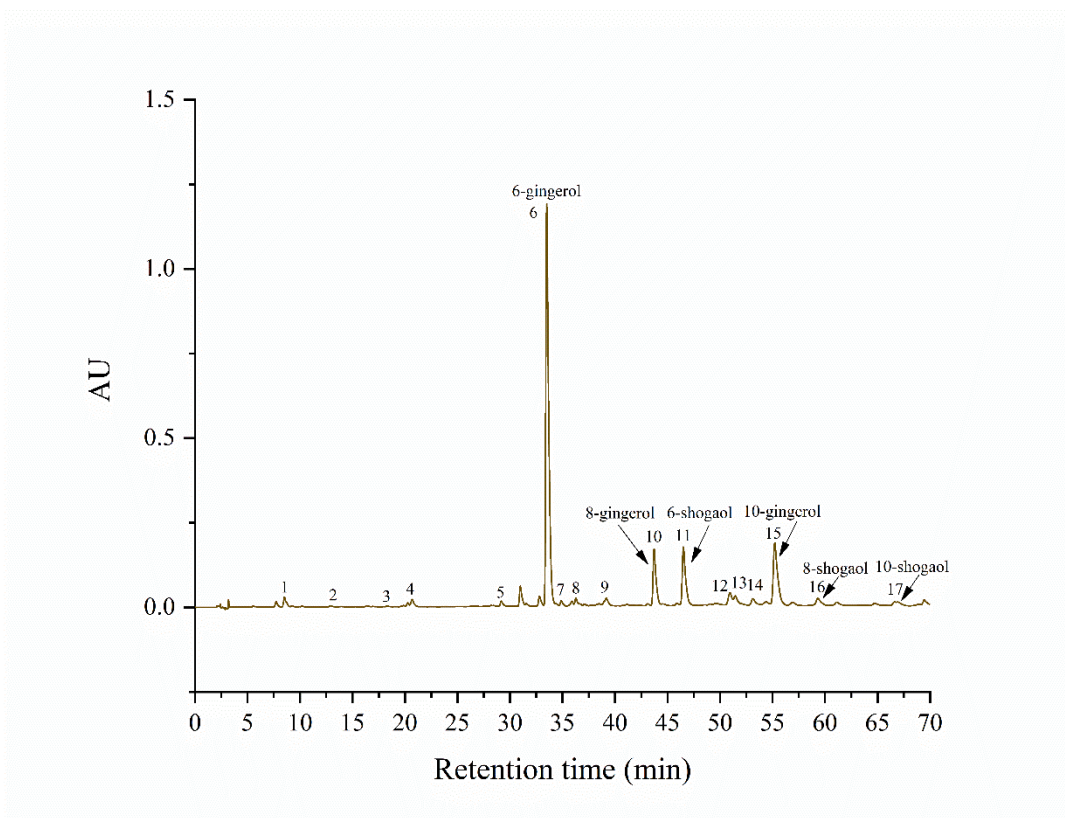

**Supplementary Fig. S 1.** HPLC profiles of gingerols and their derivatives in GE at 280 nm.

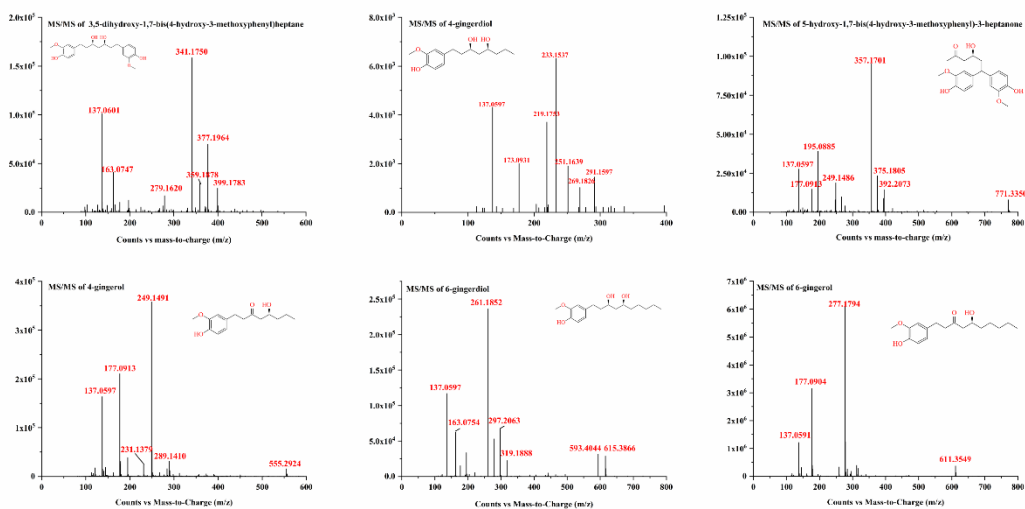

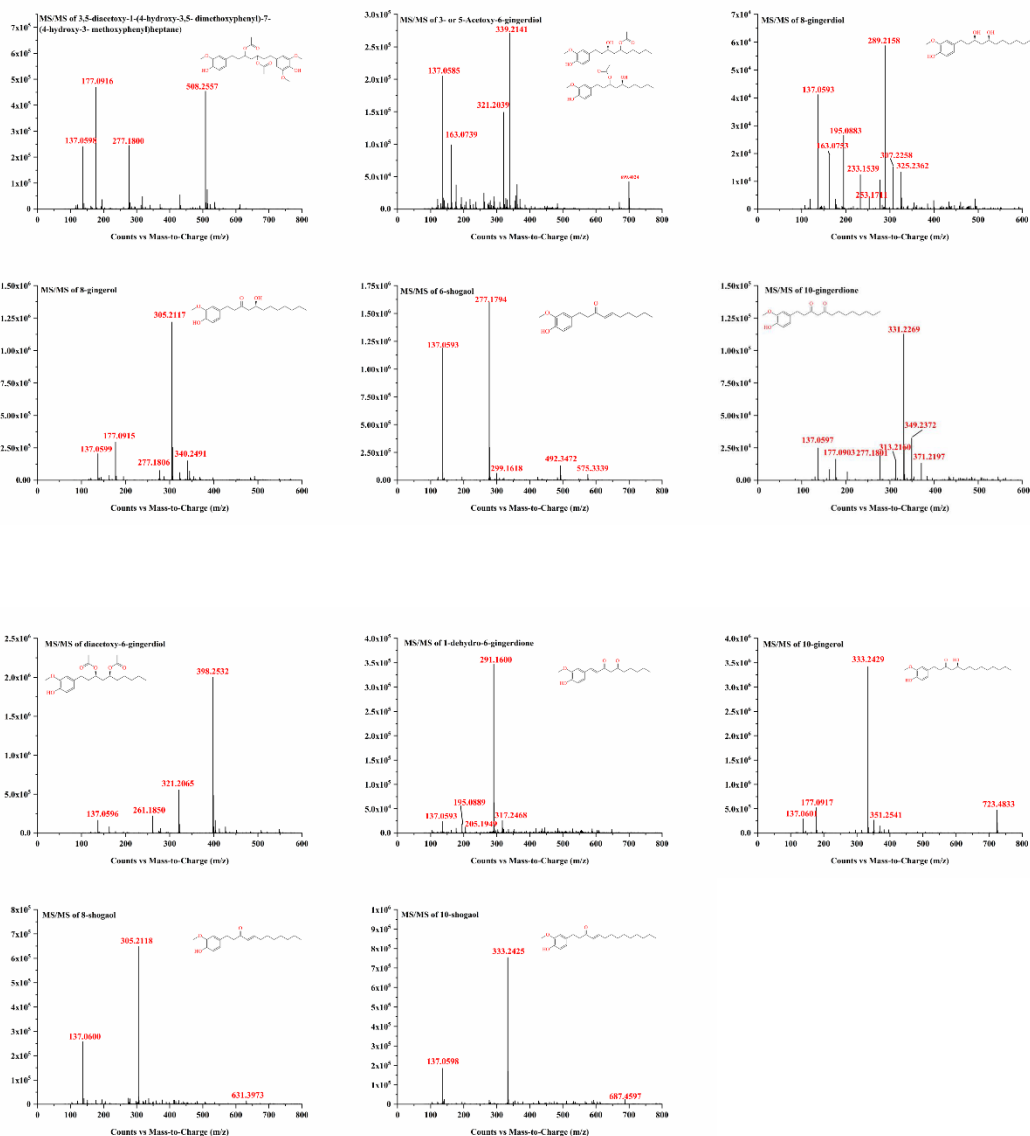

**Supplementary Fig. S 2.** The MS/MS information and chemical structure of 17 gingerol-related compounds in GE.
